# Supplementary material for: Anthocyanin Accumulation in Black Kernel Mutant Rice and its Contribution to ROS Detoxification in Response to High Temperature at the Filling Stage
Source: PubMed Central journal article supplement (PMC6912731; doi:10.3390/antiox8110510), 2019-10-25

# Anthocyanin accumulation in black kernel mutant rice and its contribution to ROS detoxification in response to high temperature at filling stage

Syed Hassan Raza Zaidi<sup>1</sup>, Shamsu Ado Zakari<sup>1</sup>, Qian Zhao<sup>1</sup>, Ali Raza Khan<sup>1</sup>, Jawad Munawar Shah<sup>2</sup>, Fangmin Cheng<sup>1\*</sup>.

<sup>1</sup> Institute of Crop Science, College of Agriculture and Biotechnology, Zhejiang University, Hangzhou, 310058, China

<sup>2</sup> College of Agriculture, Bahauddin Zakariya University Sub-Campus Bahadur, Layyah, 31200, Pakistan

\*Correspondence, Fangmin Cheng, Institute of Crop Science, Zhejiang University, Hangzhou, 310058, China

Email: [chengfm@zju.edu.cn](mailto:chengfm@zju.edu.cn)

Telephone: +86 571 86771117

## Supplementary tables and figures

**Table S1** Sequence of primers for genes involved in Anthocyanin Biosynthesis used for real-time quantitative polymerase chain reaction

| Gene   | Accession No. | Primer Pairs                                              | Products (bp) |
|--------|---------------|-----------------------------------------------------------|---------------|
| ACTIN  | X16280        | 5'-CAGCACATTCCAGCAGATGT-3'<br>5'-TAGGCCGGTTGAAAACCTTTG-3' | 198           |
| OsPAL  | X16099        | 5'-GAACATCAAGAGCTCCGTCA-3'<br>5'-AGGAGGTTCTTCTCGCTGAA-3'  | 111           |
| OsCHS  | X89859        | 5'-GCCGACTACCCGGACTACTA-3'<br>5'-TCTTCCTGATCTGCGACTTG-3'  | 103           |
| OsCHI  | AF474922      | 5'-TTCTACTGCCCTCGTGTTTG-3'<br>5'-CAATTCAGAGATGGAACGGA-3'  | 79            |
| OsF3H  | AC092697      | 5'-AGAAGCTCATCACCGACGAC-3'<br>5'-CAGTGCTCCTGGTCAAGGTT-3'  | 80            |
| OsF3'H | HQ876708      | 5'-GCGCTACCCTCCTAGTCAAC-3'<br>5'-AGAAACCGAGAAGGCTGGTA-3'  | 88            |
| OsDFR  | Y07956        | 5'-CGAGAAGGAACCGATACTGG-3'<br>5'-ACCGTTCTCTGGACTCACTA-3'  | 101           |
| OsANS  | Y07955        | 5'-ACGCAAGCTGTTCAAGAAGC-3'<br>5'-TATCATTCGGTTCGATGCAG-3'  | 70            |

**Figure S1** HPLC chromatogram of anthocyanidins in 9311*bk* extract;  
peak 1, Cyanidin-3-o-glucoside;  
peak 2, Peonidin-3-O-glucoside.

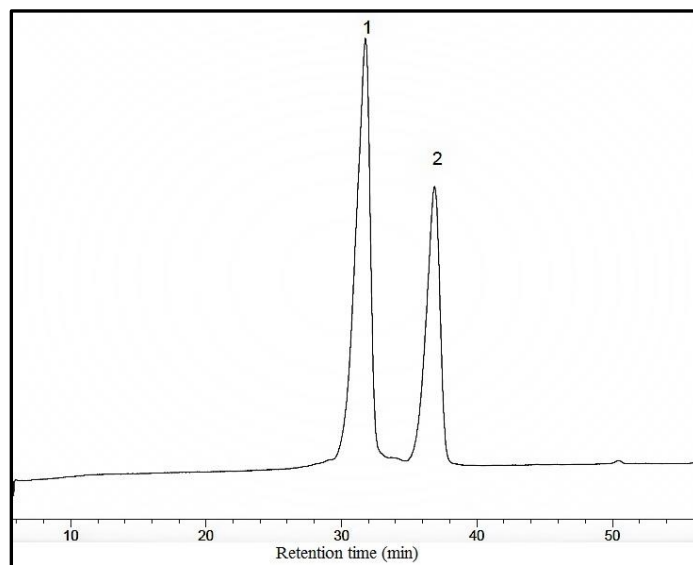

Supplement: antioxidants-08-00510-s001.pdf [file antioxidants-08-00510-s001.pdf]
